# Supplementary material
Source: PubMed Central journal article supplement (PMC6106101)
Supplement: cvy111_supplementary_material.pdf [file cvy111_supplementary_material.pdf]

## Supplementary Materials for

### **DNA methylation of a *PLPP3* MIR transposon-based enhancer promotes an osteogenic program in calcific aortic valve disease**

Ghada Mkannez, PhD<sup>1</sup>; Valérie Gagné-Ouellet, MSc<sup>2,3</sup>; Mohamed Jalloul Nsaibia, MSc<sup>1</sup>; Marie-Chloé Boulanger, PhD<sup>1</sup>; Mickael Rosa, PhD<sup>1</sup>; Deborah Argaud, MSc<sup>1</sup>; Fayez Hadji, PhD<sup>1</sup>; Nathalie Gaudreault, BSc<sup>4</sup>; Gabrielle Rhéaume<sup>1</sup>; Luigi Bouchard, PhD, MBA<sup>2,3</sup>; Yohan Bossé, PhD<sup>4</sup>; Patrick Mathieu, MD, MSc, FRCSC<sup>1</sup>

<sup>1</sup>Laboratory of Cardiovascular Pathobiology, Quebec Heart and Lung Institute/Research Center, Department of Surgery, Laval University, Quebec, Canada

<sup>2</sup>Department of Biochemistry, Université de Sherbrooke, Sherbrooke, Qc, Canada;

<sup>3</sup>ECOGENE-21 and Lipid Clinic, Chicoutimi Hospital, Saguenay, Qc, Canada

<sup>4</sup>Department of Molecular Medicine, Laval University, Quebec, Canada

#### **Address for correspondence:**

Dr Patrick Mathieu Institut de Cardiologie et de Pneumologie de Québec/Québec Heart and Lung Institute, 2725 Chemin Ste-Foy, Québec, Québec, Canada, G1V-4G5

Phone number: 418-656-8711

Fax number: 418-656-4707

E-mail address: [patrick.mathieu@fmed.ulaval.ca](mailto:patrick.mathieu@fmed.ulaval.ca)

#### **This file includes:**

Materials and Methods

Supplementary table 1

References

### **Whole genome gene expression dataset**

A total of twelve CAVD valves and twelve normal aortic valves were selected for microarray analysis. The description of the population as well as the detailed methodology of the microarray have been previously published<sup>1</sup>. Briefly, to reduce heterogeneity, only tricuspid valves from Caucasian male subjects without diabetes were selected. The two valve groups were also matched for patient's age, body mass index, and the absence of renal failure. Expression studies were performed using the HumanHT-12 v4 Expression BeadChip (Illumina, CA, USA). QC was performed as described by Chow and coworkers<sup>2</sup>. The raw data were quantile normalized after log<sub>2</sub>-transformation with the lumi package in R<sup>3</sup>. Genes differentially expressed by microarray were identified using the significant analysis of microarrays (SAM) method<sup>4</sup> with the false discovery rate set at 5% and fold change threshold set at 1.2.

### **Valve interstitial cell isolation**

Aortic leaflets were incubated in 1mg/ml type I collagenase at 37°C for 30 minutes, then washed in HEPES1X, cut into pieces and incubated in 4.5mg/ml type I collagenase at 37°C for 30 minutes. Tissues were then washed in normal medium 3 times and seeded. Cells were used between passages 3 to 7.

## Luciferase reporter sequences

DNA sequence minimal promoter:

```
CTGAGACTCCTTCACCCAGAAAAAGGTAATTGCTAACCCTCACAGAGCACTTCCTA
TGTACTGGGCACTGTTCTAGGAGCTTATACGGATTAACAAATTAAGTCTTCACAACC
ACCCTATATGAAAAGGAACAGTTATCTCTAGTTACATACGGGGAAACTGAGGCACAG
AGTCACAGGATTGAAATCCAGGAGATGTGGTTCCACAGTCGTGCAGTCTTTTTTCATTT
TAGTATTCTCAAATCTAGCGTAGTACCCGGTGTGGATGTTAAGATCTTAAACAAA
CAAACAACCTGTTTTCTTAAAAATTATATTTTCAGGGTAATACAATTCAAGTCACAA
TAAAGACCTGAAAGCCTCAGGTTTGTAGGTGAGGAAAAATGCATTTTAGCTGTACAG
CCCTAACTTTTACTTGACCCAAGGCCAGCAAGAAAATGTTTCTTTTTATTTATATATA
TTTTTTCTTTGGTGACAATTTGGTGTCTTGAACGCTAGGGGCTCCCGGTTTCTCTGGT
TTGAGAGTAACTTTTCCTTTTAGGACTTTTTTTTTTTTTTTTT
```

DNA sequence enhancer:

```
ACAAGTACTGTGCGTTTTCCATTACACCATGATTCGCTTTAAAAAAAAAAAAATCCT
AGGCTGACTTCAACCTTGGAAGTCCTGTTTATTCTTGTGAAGCGCTTTCTCCCTCCC
TACCGAGTTCATAAATCCTCCTCGCCCTCCCACTCCAATTCTTTAACTCCCACCGCT
CTTCCAGCTGTGGCTTCCAACGACTTTGGAAAACAGAAGTGGACCATCGCCTCAACT
TTCTGGGGGCGCAATTAATTTGTGGTCCCCAAACAAGATCGCAGCTGGCTTTCCCA
GTGCCTCAATGTGCCCATCAGGGAAATGGGGCTCATCACCCCTGCTGCACCGAGTCA
GAGAGTGGGCGAGCTAAACTGATGCCCTGAAGCCGCCTACCACCTGGCACACAG
TAGGCACTCAAGTGATTGCGAAGCCGTGCCAGCACCAAGCCCGGGGAAAGCACCT
ACAGGAGAGGAGCAAGTGAAAAGGCCGGCTAGCCAGTCTGGCGAGCCTGGGCAGCA
```

**Supplementary table 1:** Clinical characteristics of patients for microarray analysis

|                                      | <b>Control valves<br/>(n=12)</b> | <b>CAVD<br/>(n=12)</b> | <b>p-value</b> |
|--------------------------------------|----------------------------------|------------------------|----------------|
| Age                                  | 58 ± 2                           | 64 ± 1                 | 0.01           |
| Male (%)                             | 100                              | 100                    | --             |
| Smoking (%)                          | 0                                | 0                      | --             |
| Hypertention (%)                     | 25                               | 75                     | 0.03           |
| Diabetes (%)                         | 0                                | 0                      | --             |
| Coronary heart disease (%)           | 33                               | 50                     | 0.68           |
| Bicuspid aortic valves (%)           | --                               | 0                      | --             |
| BMI (kg/m <sup>2</sup> )             | 28 ± 1                           | 29 ± 2                 | 0.39           |
| Statins (%)                          | 42                               | 92                     | 0.02           |
| Aortic valve area (cm <sup>2</sup> ) | --                               | 0.84 ± 0.08            | --             |
| Aortic peak gradient (mmHg)          | --                               | 58 ± 6                 | --             |
| Aortic mean gradient (mmHg)          | --                               | 36 ± 4                 | --             |
| Triglycerides (mmol/L)               | 1.27 ± 0.22                      | 1.51 ± 0.33            | 0.55           |
| LDL (mmol/L)                         | 2.00 ± 0.24                      | 2.01 ± 0.11            | 0.98           |
| HDL (mmol/L)                         | 1.09 ± 0.09                      | 1.15 ± 0.06            | 0.58           |
| Creatinine (µmol/L)                  | 103 ± 6                          | 91 ± 6                 | 0.13           |
| Creatinine clearance (ml/min)        | 79 ± 6                           | 84 ± 6                 | 0.58           |

Values are mean±SEM or %; P values: Student t test or Fisher exact test; BMI: body mass index; LDL: low-density lipoprotein cholesterol; HDL: high-density lipoprotein cholesterol; and SEM, standard error of the mean.

## Reference List

1. Guauque-Olarte S, Droit A, Tremblay-Marchand J, Gaudreault N, Kalavrouziotis D, Dagenais F, Seidman JG, Body SC, Pibarot P, Mathieu P and Bosse Y. RNA expression profile of calcified bicuspid, tricuspid, and normal human aortic valves by RNA sequencing. *Physiol Genomics*. 2016;48:749-761.
2. Chow ML, Winn ME, Li HR, April C, Wynshaw-Boris A, Fan JB, Fu XD, Courchesne E and Schork NJ. Preprocessing and Quality Control Strategies for Illumina DASL Assay-Based Brain Gene Expression Studies with Semi-Degraded Samples. *Front Genet*. 2012;3:11.
3. Du P, Kibbe WA and Lin SM. lumi: a pipeline for processing Illumina microarray. *Bioinformatics*. 2008;24:1547-8.
4. Tusher VG, Tibshirani R and Chu G. Significance analysis of microarrays applied to the ionizing radiation response. *Proc Natl Acad Sci U S A*. 2001;98:5116-21.
